January 2014

# PSYCHIATRIC SERVICES

A Journal of the  
American Psychiatric  
Association

- ◆ Restricting Gun Ownership by People With Mental Illness: Research and Policy Priorities
- ◆ How Information Technology Is Changing Service Delivery: Two Reviews of Applications
- ◆ California's Ban on Efforts to Change Sexual Orientation: Limiting Freedom of Speech?

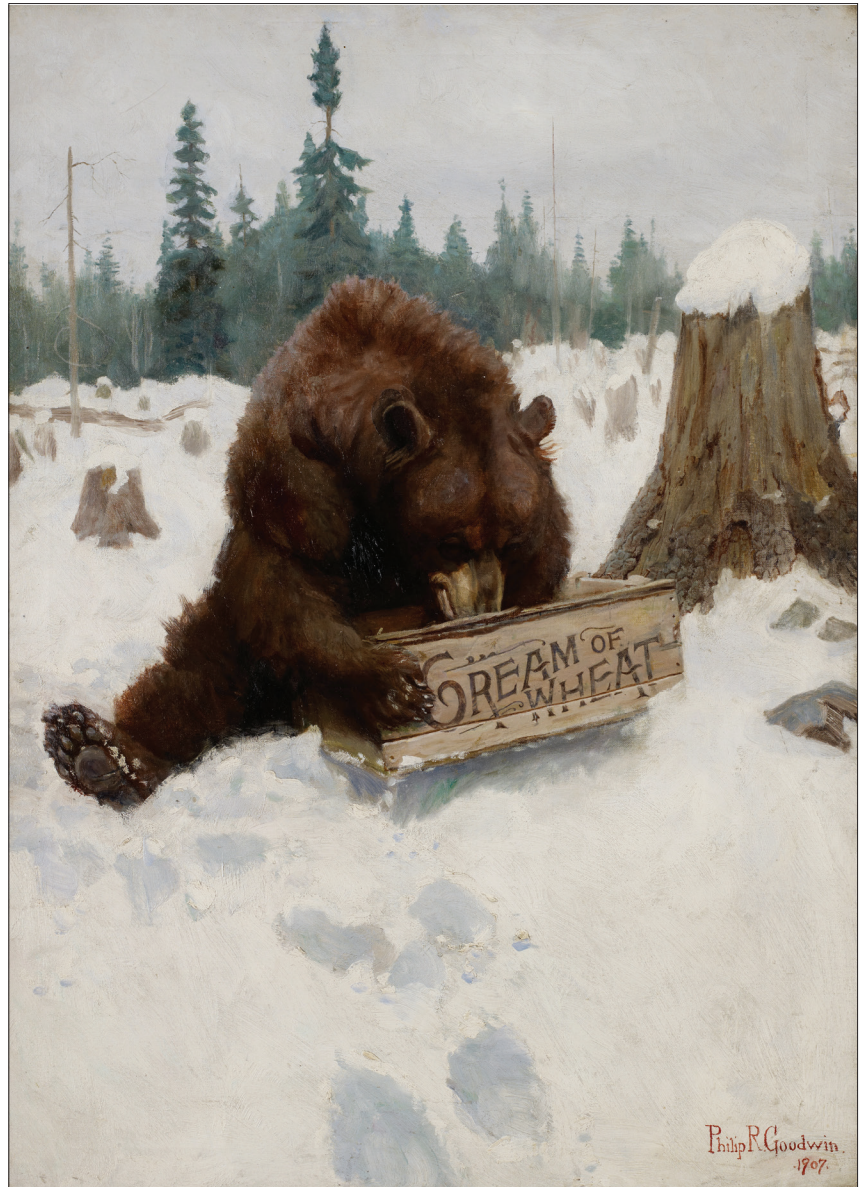

Source: https://psychiatryonline.org/doi/suppl/10.1176/ps.2014.65.issue-1/suppl_file/cover.pdf
